# Supplementary material for: Radiosynthesis and Bioevaluation of 99mTc-Labeled Isocyanide Ubiquicidin 29-41 Derivatives as Potential Agents for Bacterial Infection Imaging
Source: MDPI journal article supplement (doi:10.3390/ijms25021045), 2024-01-15
Supplement: s1 [file s1]

# Radiosynthesis and Bioevaluation of $^{99m}\text{Tc}$ -Labeled Isocyanide Ubiquicidin 29-41 Derivatives as Potential Agents for Bacterial Infection Imaging

Yuhao Jiang <sup>1,†</sup>, Peiwen Han <sup>1,†</sup>, Guangxing Yin <sup>1</sup>, Qianna Wang <sup>1</sup>, Junhong Feng <sup>1,2</sup>, Qing Ruan <sup>1,3</sup>, Di Xiao <sup>1</sup> and Junbo Zhang <sup>1,\*</sup>

<sup>1</sup> Key Laboratory of Radiopharmaceuticals of Ministry of Education, NMPA Key Laboratory for Research and Evaluation of Radiopharmaceuticals (National Medical Products Administration), College of Chemistry, Beijing Normal University, Beijing 100875, China; 202131150056@mail.bnu.edu.cn (Y.J.); 202221150118@mail.bnu.edu.cn (P.H.); 202331150067@mail.bnu.edu.cn (G.Y.); 202231150061@mail.bnu.edu.cn (Q.W.); 201921150102@mail.bnu.edu.cn (J.F.); 11132022029@bnu.edu.cn (Q.R.); 202031150054@mail.bnu.edu.cn (D.X.)

<sup>2</sup> Department of Isotopes, China Institute of Atomic Energy, P.O. Box 2108, Beijing 102413, China

<sup>3</sup> Key Laboratory of Beam Technology of the Ministry of Education, College of Nuclear Science and Technology, Beijing Normal University, Beijing 100875, China

\* Correspondence: zhjunbo@bnu.edu.cn; Tel.: +86-10-6220-8126

## Content

|                                                                                                                                                                                                              |    |
|--------------------------------------------------------------------------------------------------------------------------------------------------------------------------------------------------------------|----|
| Figure S1. ESI-MS spectrum of compound L1 CN5UBI 29-41 .....                                                                                                                                                 | 2  |
| Figure S2. UV-HPLC chromatogram of compound L1 CN5UBI 29-41 .....                                                                                                                                            | 3  |
| Figure S3. ESI-MS spectrum of compound L2 CN6UBI 29-41 .....                                                                                                                                                 | 3  |
| Figure S4. UV-HPLC chromatogram of compound L2 CN6UBI 29-41 .....                                                                                                                                            | 4  |
| Figure S5. ESI-MS spectrum of compound L3 CN7UBI 29-41 .....                                                                                                                                                 | 4  |
| Figure S6. UV-HPLC chromatogram of compound L3 CN7UBI 29-41 .....                                                                                                                                            | 5  |
| Figure S7. ESI-MS spectrum of compound L4 CN8UBI 29-41 .....                                                                                                                                                 | 5  |
| Figure S8. UV-HPLC chromatogram of compound L4 CN8UBI 29-41 .....                                                                                                                                            | 6  |
| Figure S9. ESI-MS spectrum of compound L5 CN9UBI 29-41 .....                                                                                                                                                 | 6  |
| Figure S10. UV-HPLC chromatogram of compound L5 CN9UBI 29-41 .....                                                                                                                                           | 7  |
| Figure S11. Radio-HPLC chromatograms of [ $^{99m}\text{Tc}$ ][ $\text{TcO}_4$ ] <sup>-</sup> and [ $^{99m}\text{Tc}$ ][ $\text{TcN}$ ] <sup>2+</sup> in HPLC system 1 .....                                  | 7  |
| Figure S12. Radio-HPLC chromatograms of [ $^{99m}\text{Tc}$ ][ $\text{TcO}_4$ ] <sup>-</sup> and [ $^{99m}\text{Tc}$ ][ $\text{Tc}(\text{CO})_3(\text{H}_2\text{O})_3$ ] <sup>+</sup> in HPLC system 2 ..... | 7  |
| Figure S13. Radio-HPLC chromatograms of [ $^{99m}\text{Tc}$ ]Tc-CNnUBI 29-41 .....                                                                                                                           | 8  |
| Figure S14. Radio-HPLC chromatograms of [ $^{99m}\text{Tc}$ ]Tc(CO) <sub>3</sub> -CNnUBI 29-41 .....                                                                                                         | 9  |
| Figure S15. Radio-HPLC chromatograms of [ $^{99m}\text{Tc}$ ]TcN-CNnUBI 29-41 .....                                                                                                                          | 10 |
| Table S1. The retention time of the $^{99m}\text{Tc}$ -labeled complexes .....                                                                                                                               | 10 |

|                                                                                                                                                      |    |
|------------------------------------------------------------------------------------------------------------------------------------------------------|----|
| Figure S16. <i>In vitro</i> stability in saline and mouse serum 6 h HPLC chromatograms of [ <sup>99m</sup> Tc]Tc-CNnUBI 29-41 .....                  | 11 |
| Figure S17. <i>In vitro</i> stability in saline and mouse serum 4 h HPLC chromatograms of [ <sup>99m</sup> Tc]Tc(CO) <sub>3</sub> -CNnUBI 29-41..... | 11 |
| Figure S18. <i>In vitro</i> stability in saline and mouse serum 4 h HPLC chromatograms of [ <sup>99m</sup> Tc]TcN-CNnUBI 29-41 .....                 | 12 |
| Table S2. Biodistribution results of [ <sup>99m</sup> Tc]Tc-CNnUBI 29-41 in <i>S. aureus</i> -infected mice ...                                      | 13 |
| Table S3. Biodistribution results of [ <sup>99m</sup> Tc]Tc(CO) <sub>3</sub> -CNnUBI 29-41 in <i>S. aureus</i> -infected mice .....                  | 14 |
| Table S4. Biodistribution results of [ <sup>99m</sup> Tc]TcN-CNnUBI 29-41 in <i>S. aureus</i> -infected mice                                         | 15 |
| Table S5. Biodistribution results of [ <sup>99m</sup> Tc]Tc-CN5UBI 29-41 in <i>S. aureus</i> -infected and turpentine-oil-inflamed mice .....        | 16 |
| Figure S19. SPECT image of [ <sup>99m</sup> Tc]Tc(CO) <sub>3</sub> -CN5UBI 29-41 in mice with bacterial infection at 120 min postinjection .....     | 17 |
| Figure S20. SPECT image of [ <sup>99m</sup> Tc]TcN-CN5UBI 29-41 in mice with bacterial infection at 120 min postinjection .....                      | 18 |

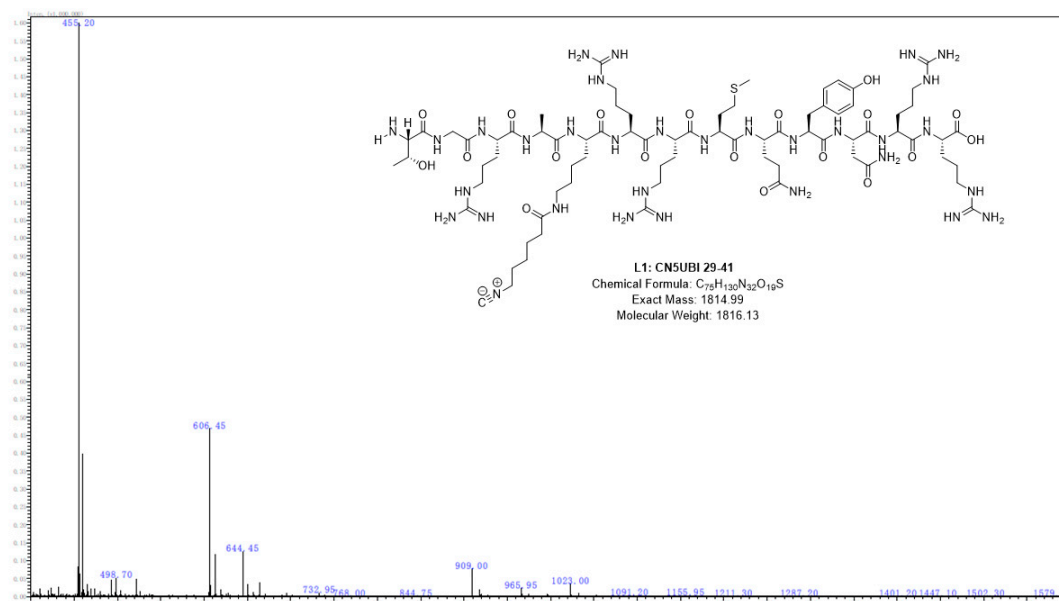

Figure S1. ESI-MS spectrum of compound L1 CN5UBI 29-41

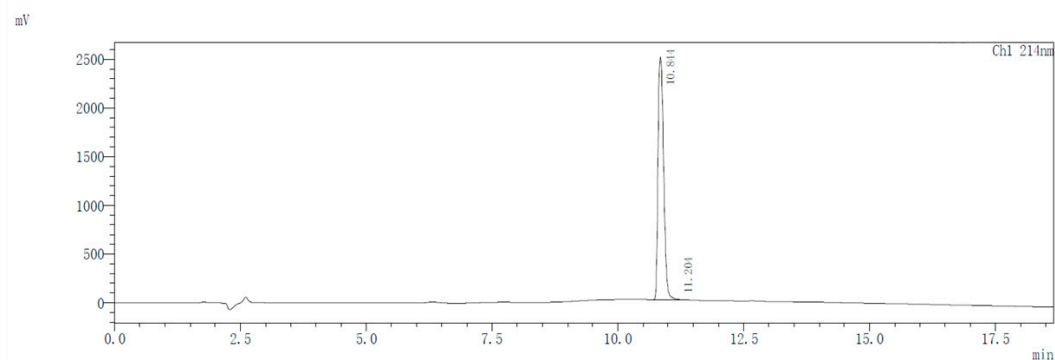

Figure S2. UV-HPLC chromatogram of compound L1 CN5UBI 29-41

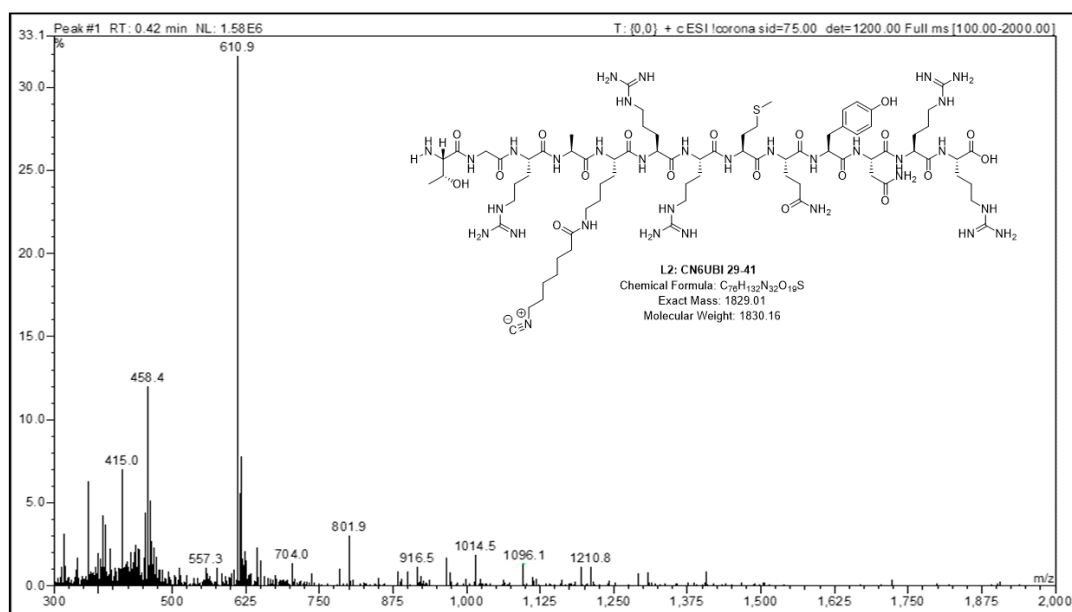

Figure S3. ESI-MS spectrum of compound L2 CN6UBI 29-41

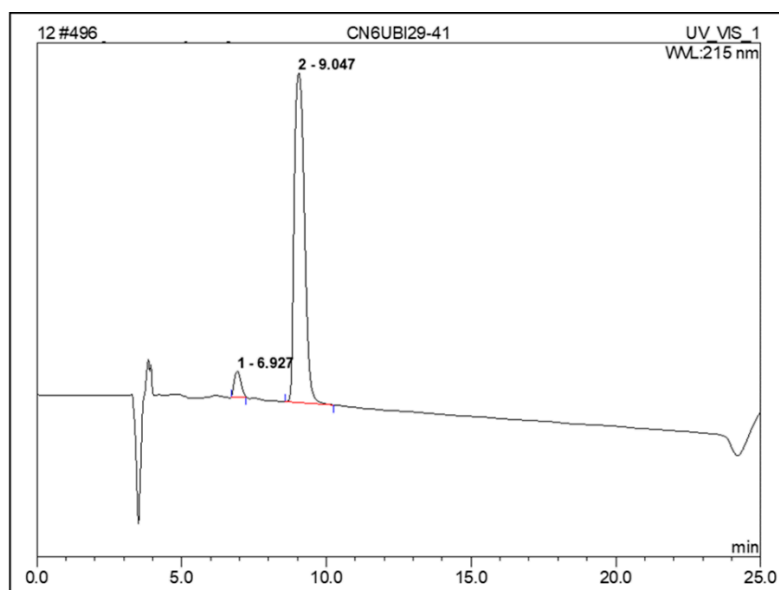

Figure S4. UV-HPLC chromatogram of compound L2 CN6UBI 29-41

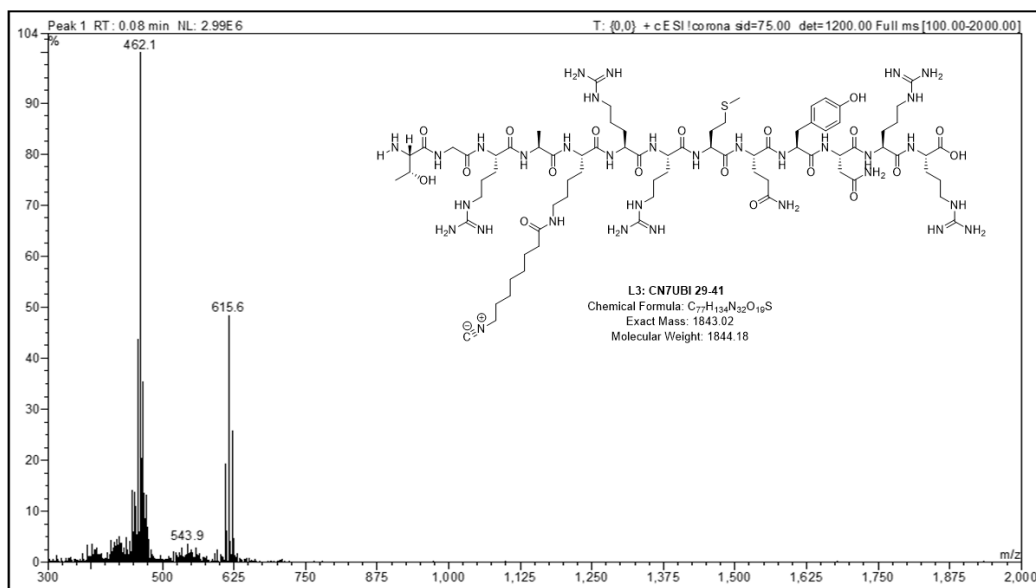

Figure S5. ESI-MS spectrum of compound L3 CN7UBI 29-41

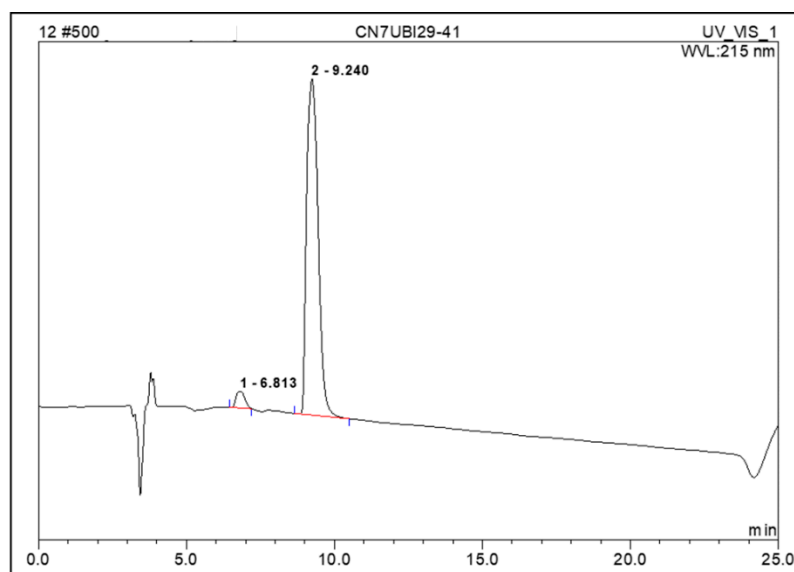

Figure S6. UV-HPLC chromatogram of compound L3 CN7UBI 29-41

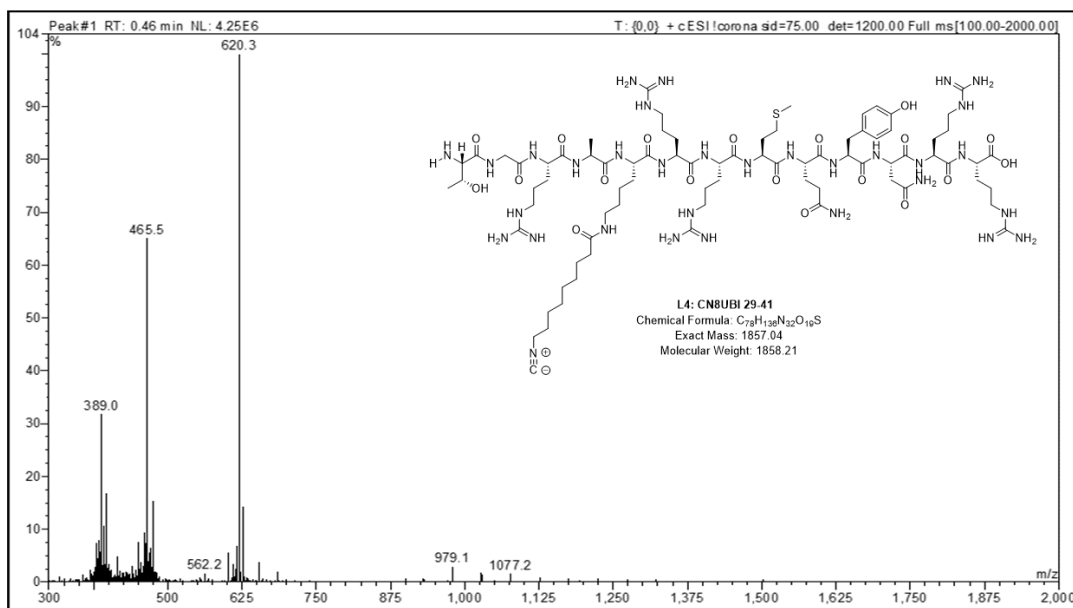

Figure S7. ESI-MS spectrum of compound L4 CN8UBI 29-41

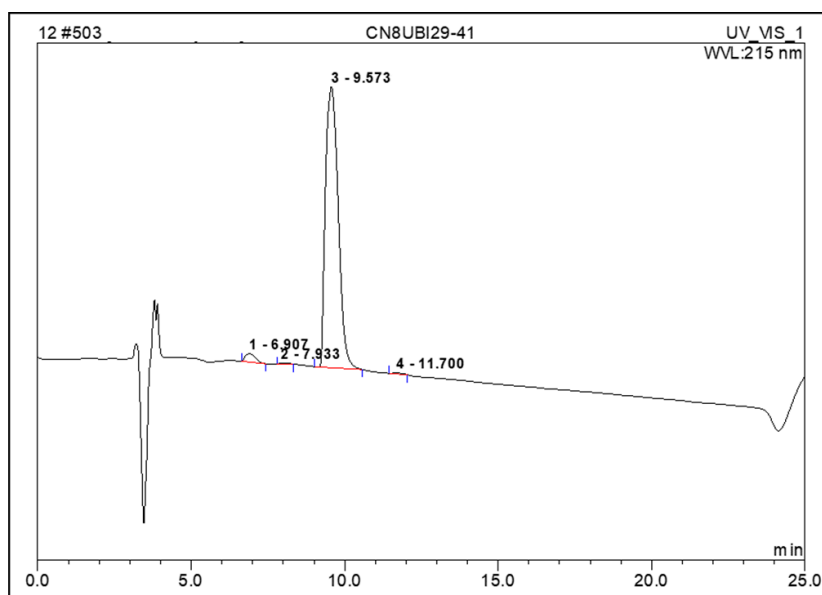

Figure S8. UV-HPLC chromatogram of compound L4 CN8UBI 29-41

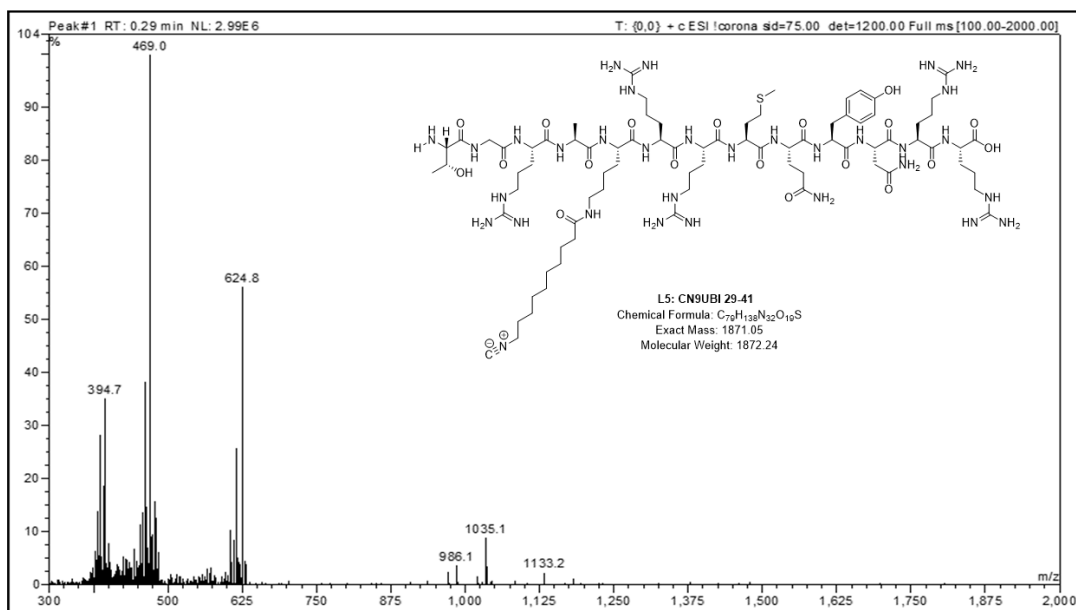

Figure S9. ESI-MS spectrum of compound L5 CN9UBI 29-41

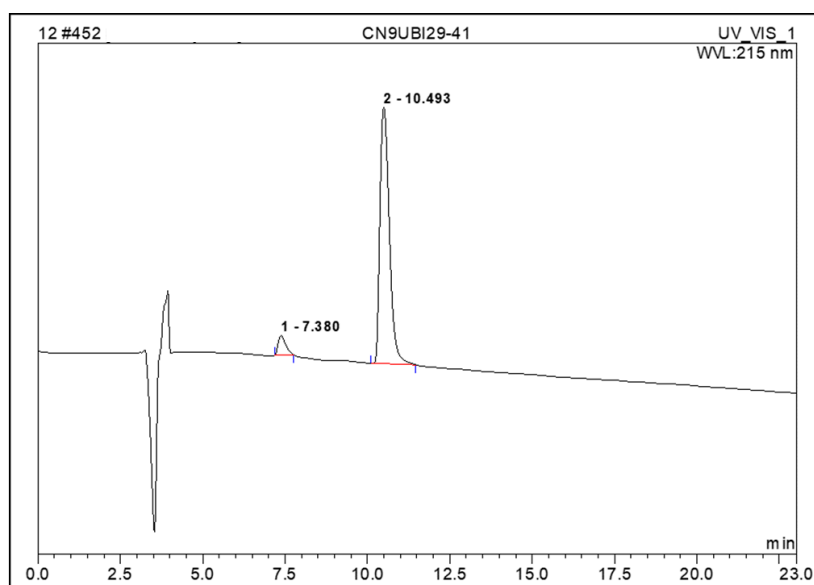

Figure S10. UV-HPLC chromatogram of compound L5 CN9UBI 29-41

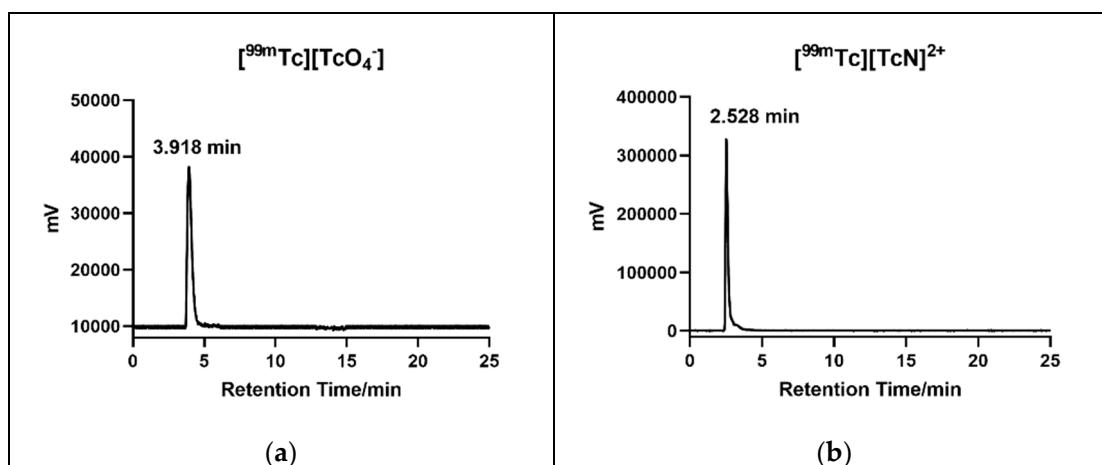

Figure S11. Radio-HPLC chromatograms of  $[^{99m}\text{Tc}]\text{TcO}_4^-$  (a) and  $[^{99m}\text{Tc}][\text{TcN}]^{2+}$  (b) in HPLC system 1.

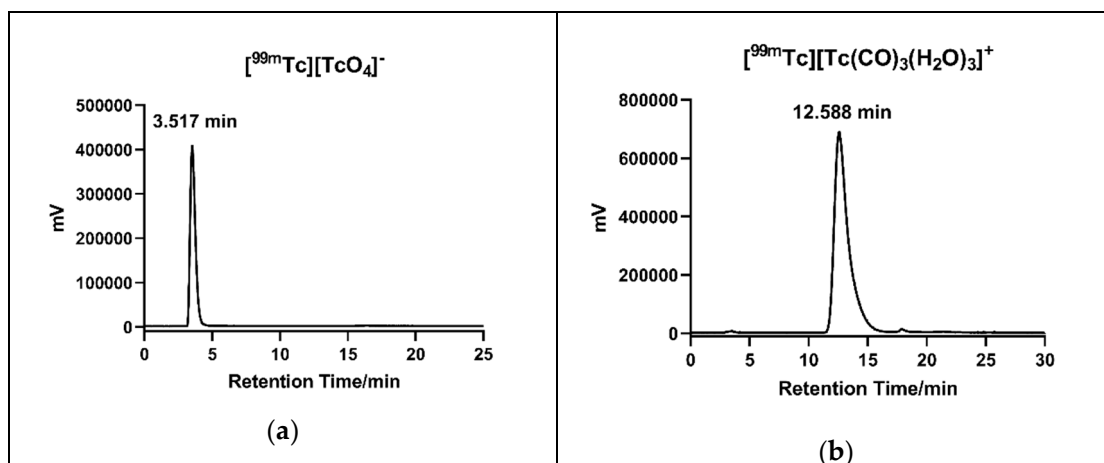

Figure S12. Radio-HPLC chromatograms of  $[^{99m}\text{Tc}]\text{TcO}_4^-$  (a) and  $[^{99m}\text{Tc}][\text{Tc}(\text{CO})_3(\text{H}_2\text{O})_3]^+$  (b) in HPLC system 2.

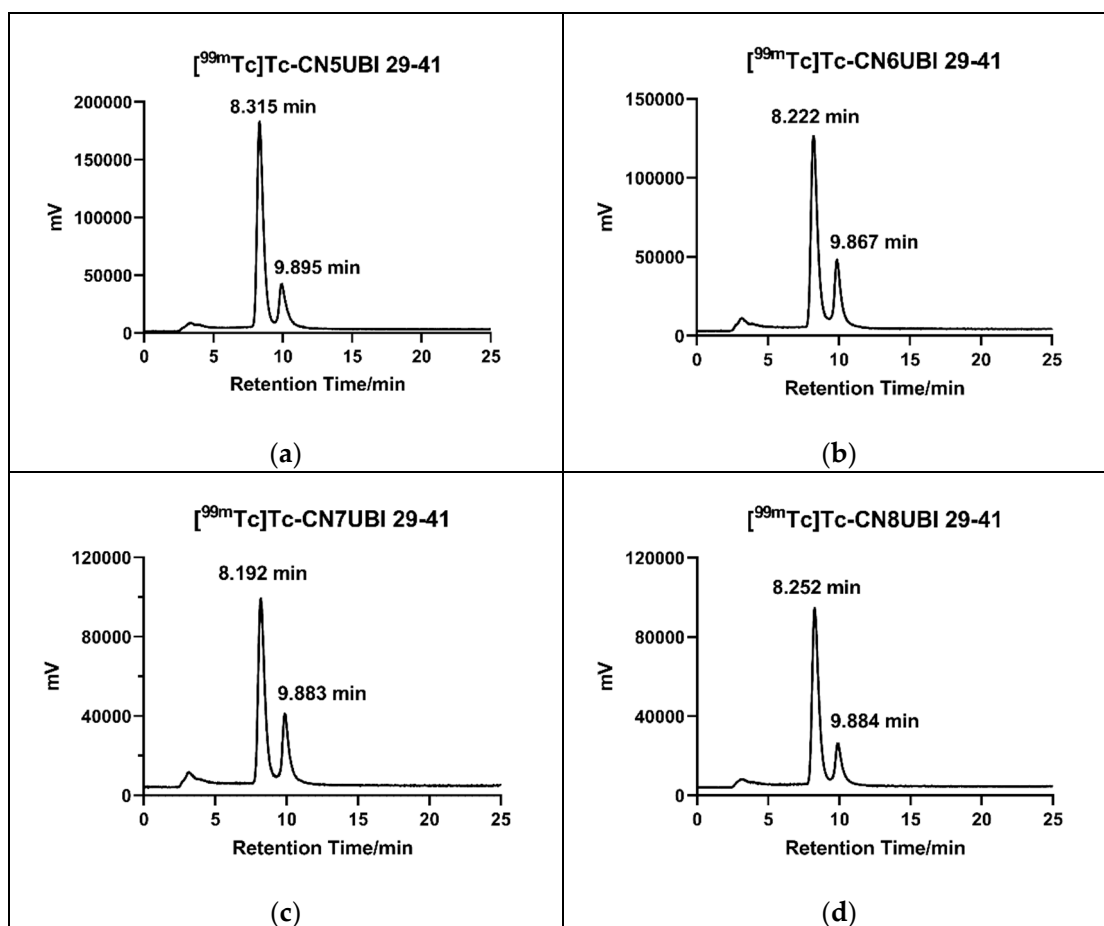

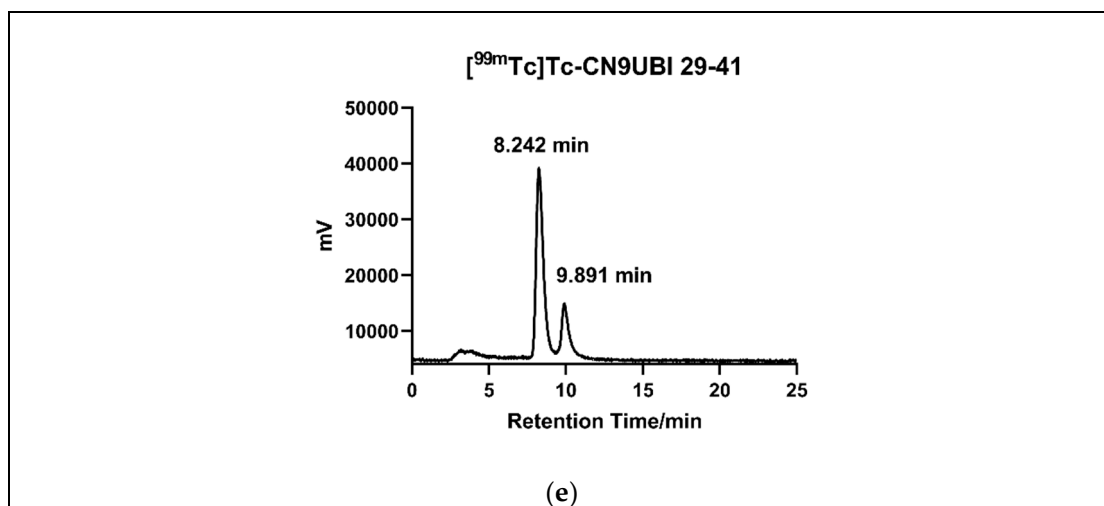

Figure S13. Radio-HPLC chromatograms of [<sup>99m</sup>Tc]Tc-CN<sub>n</sub>UBI 29-41 (*n* = 5-9).

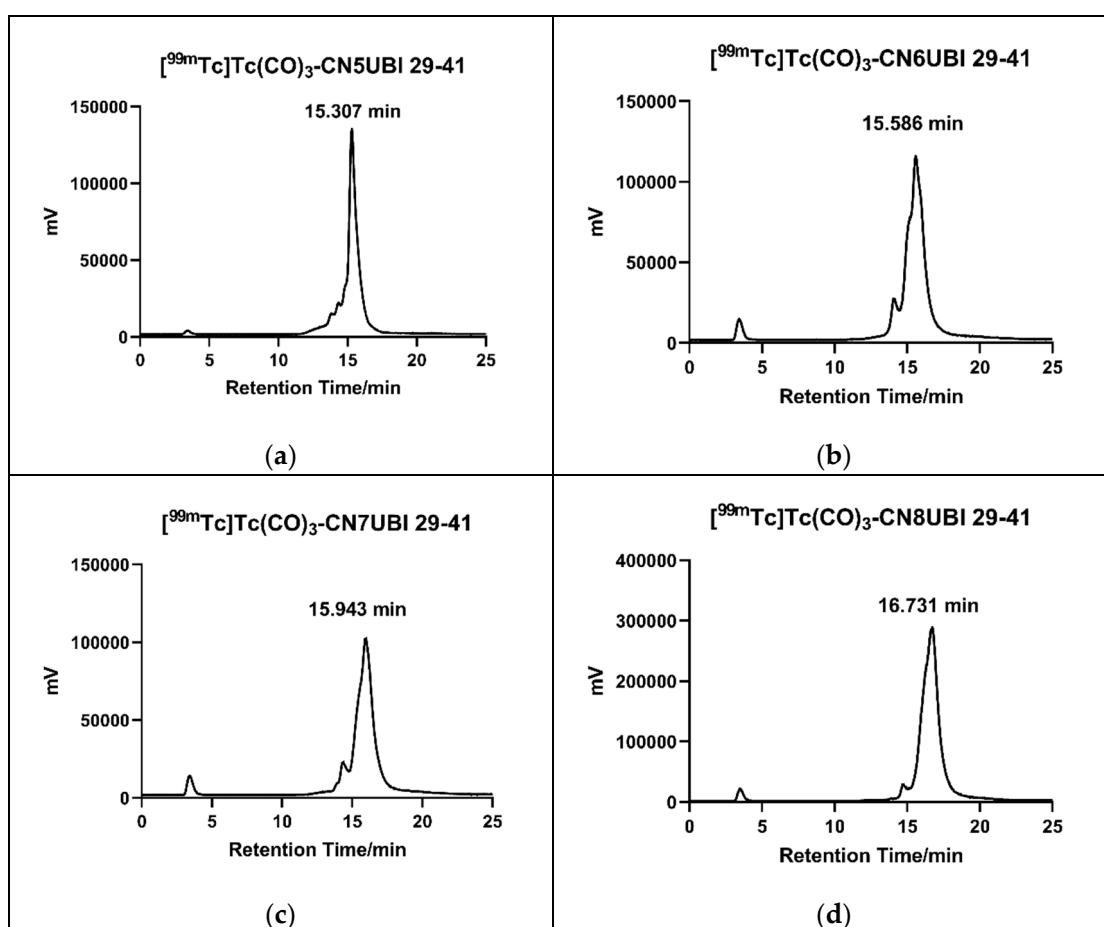



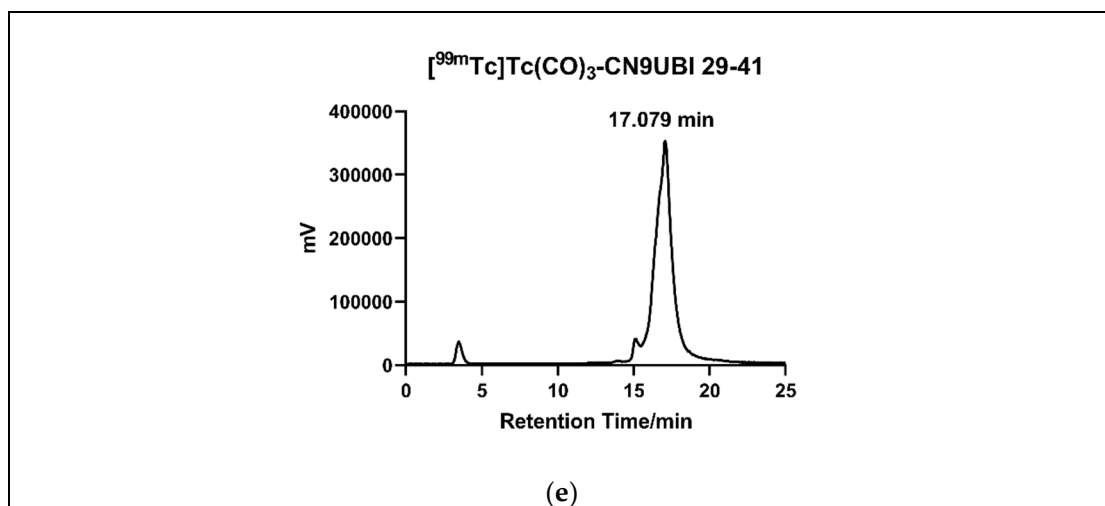

Figure S14. Radio-HPLC chromatograms of  $[^{99m}\text{Tc}]\text{Tc}(\text{CO})_3\text{-CNnUBI 29-41}$  ( $n = 5-9$ ).

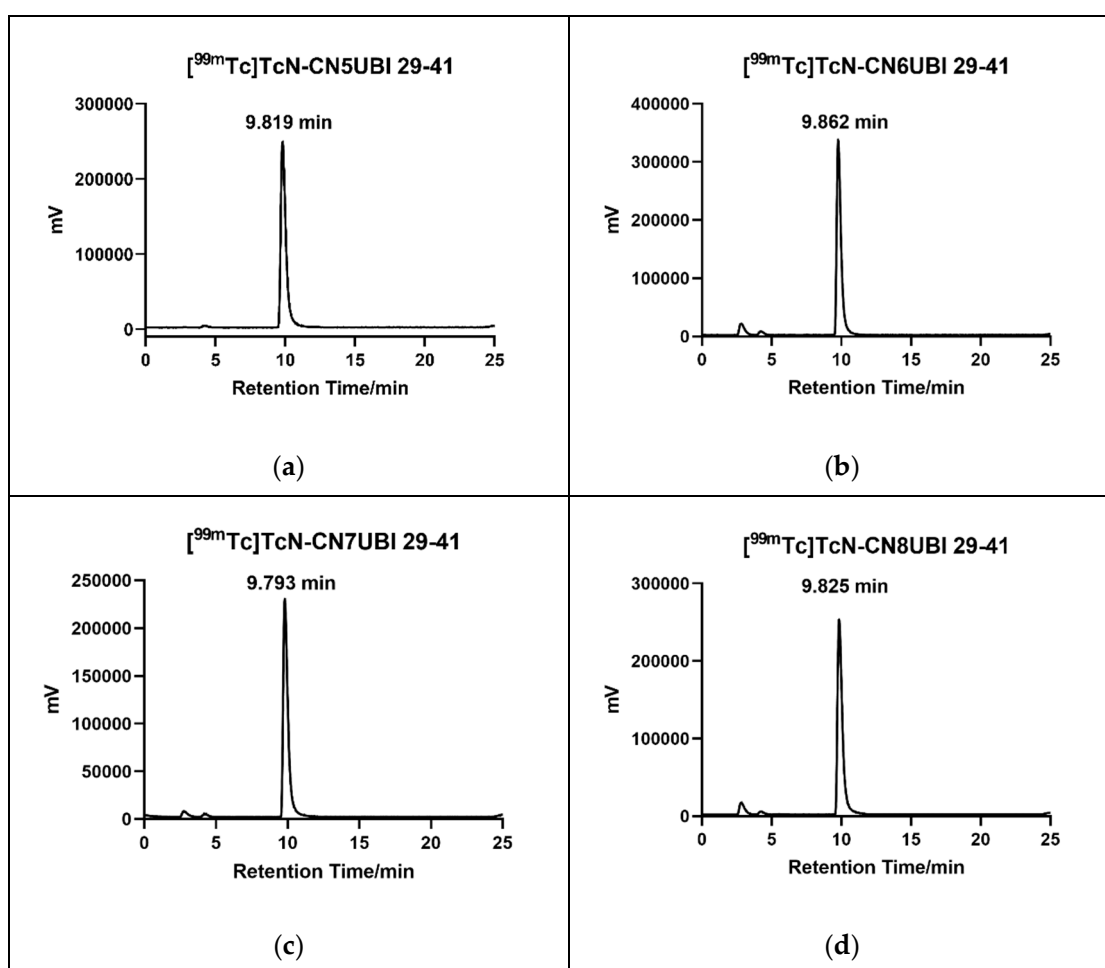

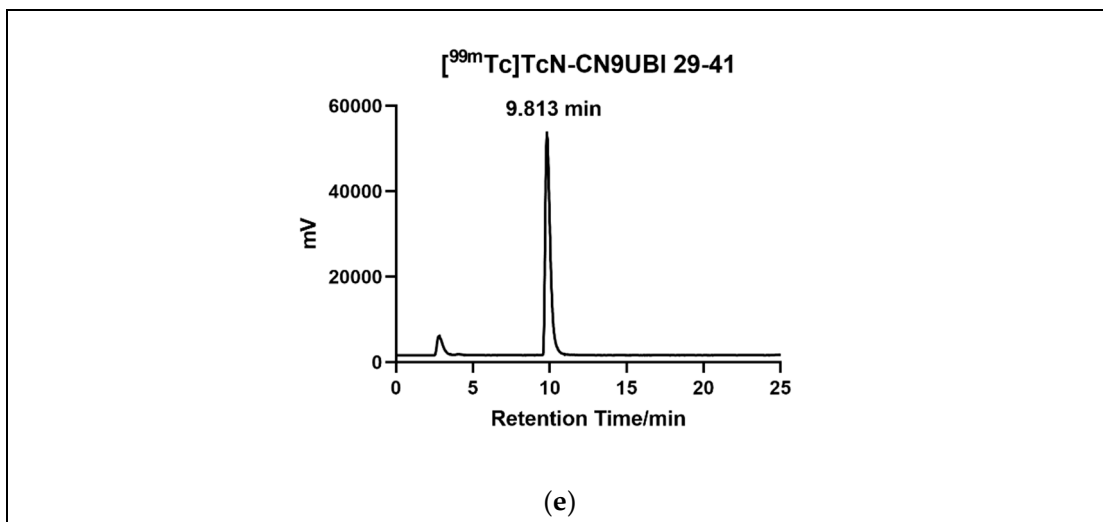

Figure S15. Radio-HPLC chromatograms of  $[^{99m}\text{Tc}]\text{TcN-CNnUBI } 29-41$  ( $n = 5-9$ ).

Table S1. The retention time of the  $^{99m}\text{Tc}$ -labeled complexes.

| Ligand           | $[^{99m}\text{Tc}][\text{Tc}(\text{I})]^+$ core | $[^{99m}\text{Tc}][\text{Tc}(\text{CO})_3(\text{H}_2\text{O})_3]^+$ core | $[^{99m}\text{Tc}][\text{Tc}(\text{V})\text{N}]^{2+}$ core |
|------------------|-------------------------------------------------|--------------------------------------------------------------------------|------------------------------------------------------------|
| L1: CN5UBI 29-41 | 8.315 min, 9.895 min                            | 15.307 min                                                               | 9.819 min                                                  |
| L2: CN6UBI 29-41 | 8.222 min, 9.867 min                            | 15.586 min                                                               | 9.862 min                                                  |
| L3: CN7UBI 29-41 | 8.192 min, 9.883 min                            | 15.943 min                                                               | 9.793 min                                                  |
| L4: CN8UBI 29-41 | 8.252 min, 9.884 min                            | 16.731 min                                                               | 9.825 min                                                  |
| L5: CN9UBI 29-41 | 8.242 min, 9.891 min                            | 17.039 min                                                               | 9.813 min                                                  |

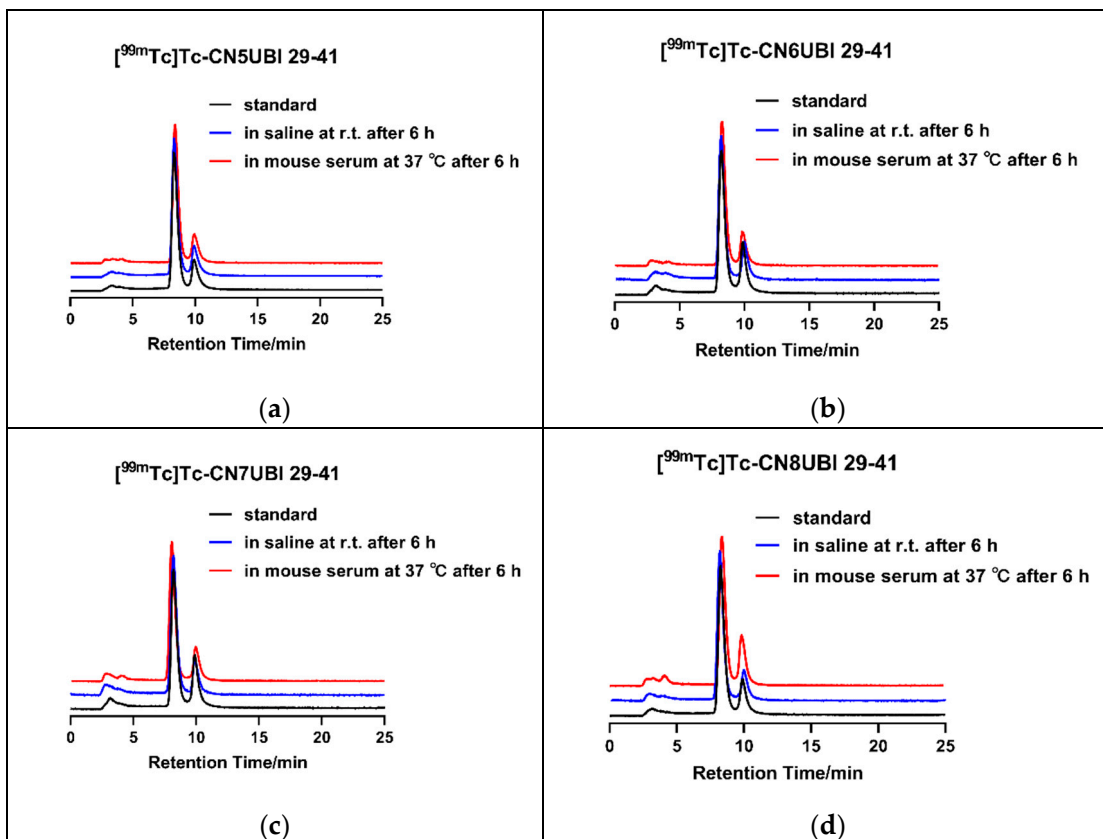

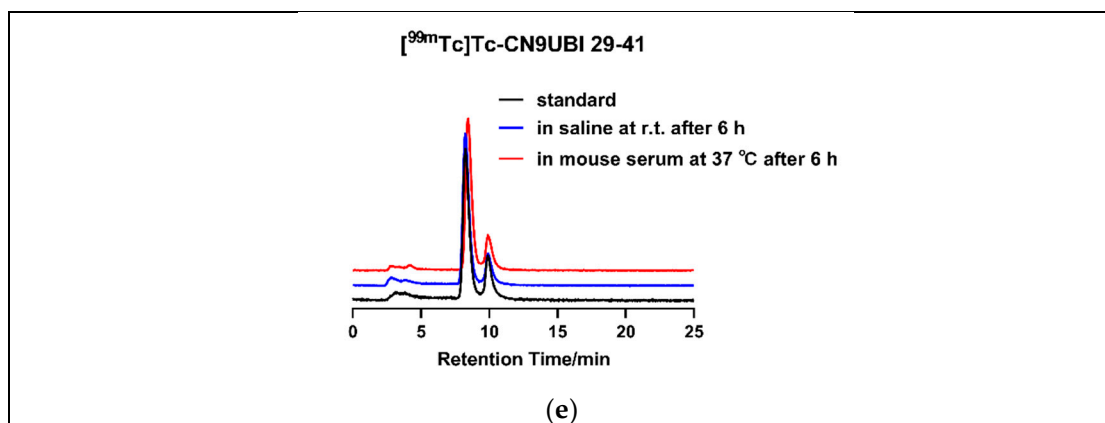

Figure S16. *In vitro* stability in saline and mouse serum 6 h HPLC chromatograms of [<sup>99m</sup>Tc]Tc-CNnUBI 29-41 (*n* = 5-9).

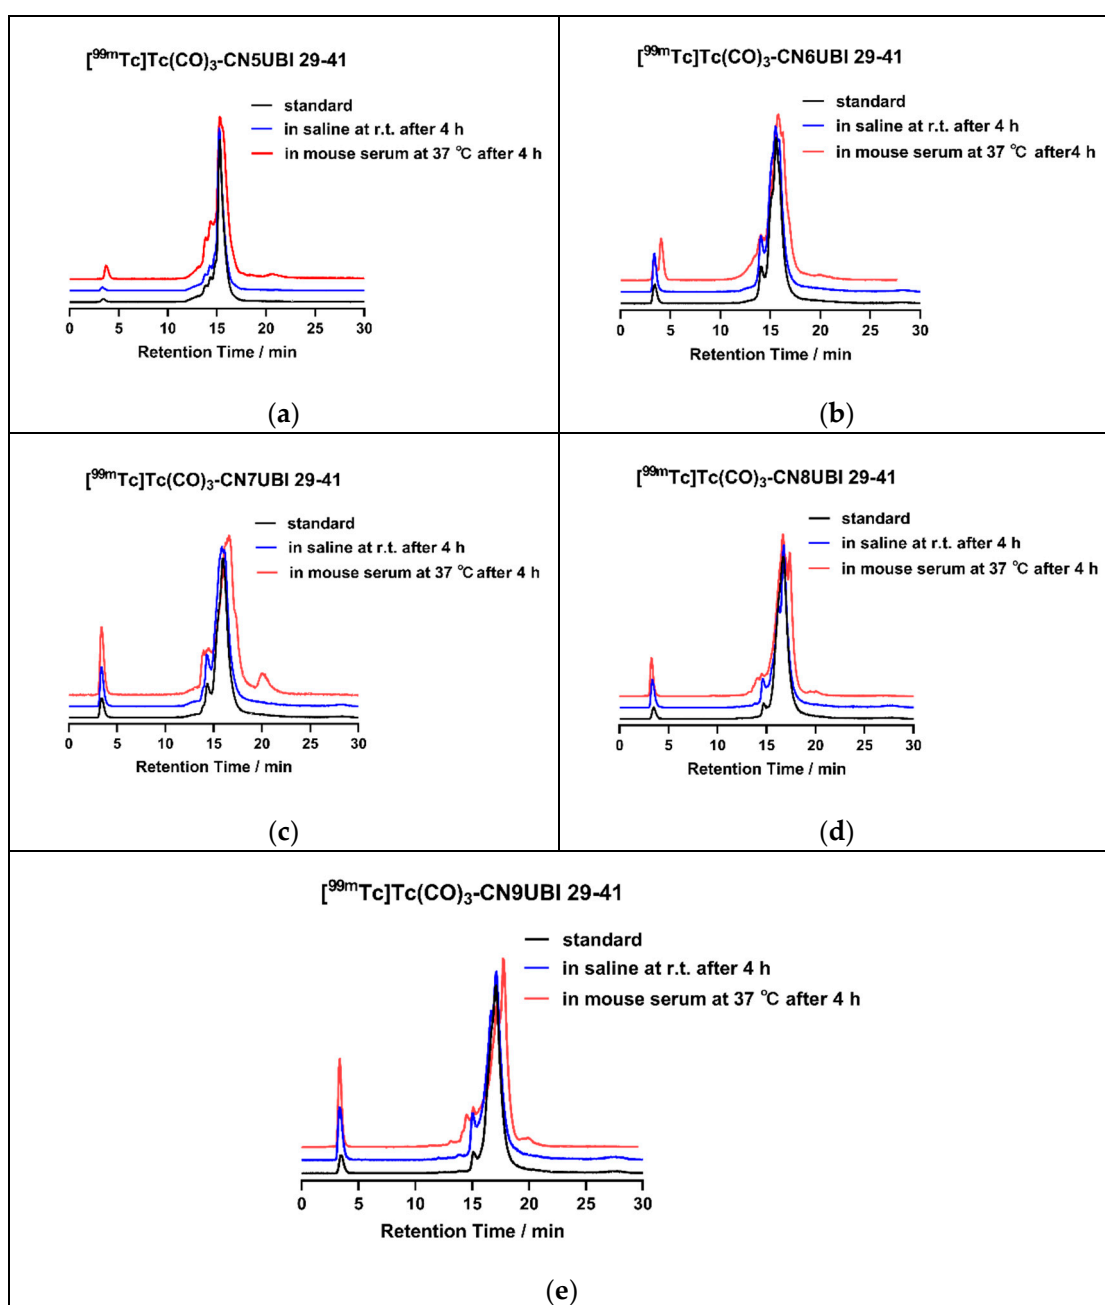

Figure S17. *In vitro* stability in saline and mouse serum 4 h HPLC chromatograms of  $[^{99m}\text{Tc}]\text{Tc}(\text{CO})_3\text{-CNnUBI 29-41}$  ( $n = 5-9$ ).

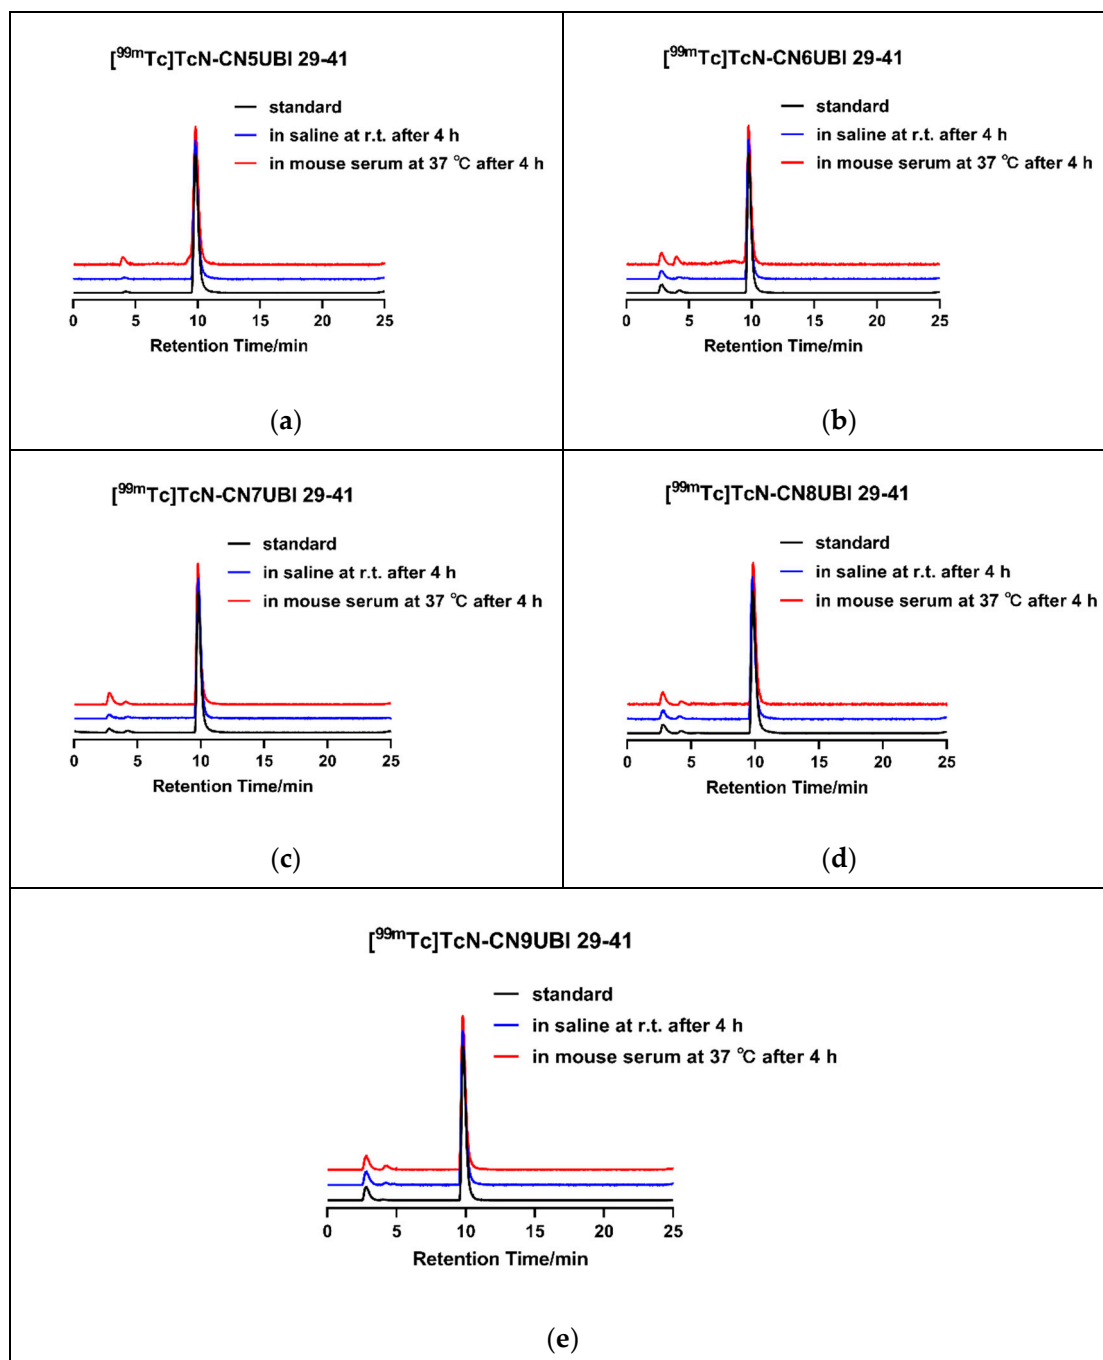

Figure S18. *In vitro* stability in saline and mouse serum 4 h HPLC chromatograms of  $[^{99m}\text{Tc}]\text{TcN-CNnUBI 29-41}$  ( $n = 5-9$ ).

Table S2. Biodistribution results of  $[^{99m}\text{Tc}]\text{Tc-CNnUBI 29-41}$  in *S. aureus*-infected mice (mean  $\pm$  SD, %ID/g,  $n = 5$ , 120 min p.i.)

| Tissues           | n = 5        | n = 6        | n = 7        | n = 8        | n = 9        |
|-------------------|--------------|--------------|--------------|--------------|--------------|
| Heart             | 0.89 ± 0.25  | 0.97 ± 0.09  | 0.51 ± 0.04  | 0.64 ± 0.02  | 0.77 ± 0.13  |
| Liver             | 2.24 ± 0.67  | 6.92 ± 0.94  | 5.57 ± 1.00  | 7.36 ± 0.78  | 6.25 ± 0.93  |
| Lung              | 1.85 ± 0.29  | 2.05 ± 0.15  | 1.47 ± 0.27  | 2.00 ± 0.51  | 2.32 ± 0.66  |
| Kidney            | 18.00 ± 3.49 | 44.78 ± 3.59 | 28.29 ± 3.41 | 30.51 ± 2.24 | 29.10 ± 2.91 |
| Spleen            | 0.77 ± 0.19  | 2.98 ± 0.42  | 2.28 ± 0.65  | 2.78 ± 0.91  | 2.90 ± 0.61  |
| Stomach           | 0.70 ± 0.24  | 0.64 ± 0.16  | 0.56 ± 0.13  | 0.97 ± 0.28  | 0.84 ± 0.43  |
| Bone              | 1.06 ± 0.14  | 1.30 ± 0.07  | 0.93 ± 0.13  | 1.01 ± 0.07  | 1.01 ± 0.16  |
| Muscle            | 0.34 ± 0.03  | 0.50 ± 0.06  | 0.34 ± 0.06  | 0.39 ± 0.04  | 0.39 ± 0.09  |
| Small Intestines  | 1.65 ± 0.95  | 2.02 ± 0.49  | 1.97 ± 0.68  | 3.03 ± 0.57  | 2.76 ± 1.16  |
| Large Intestines  | 2.23 ± 1.02  | 4.23 ± 0.93  | 4.08 ± 1.09  | 3.14 ± 0.71  | 4.96 ± 1.33  |
| Abscess           | 1.44 ± 0.46  | 1.70 ± 0.23  | 0.81 ± 0.18  | 0.99 ± 0.24  | 1.08 ± 0.23  |
| Blood             | 1.81 ± 0.29  | 2.19 ± 0.11  | 1.35 ± 0.15  | 1.42 ± 0.09  | 1.68 ± 0.32  |
| Gallbladder (%ID) | 0.13 ± 0.10  | 0.03 ± 0.01  | 0.10 ± 0.18  | 0.58 ± 0.18  | 0.55 ± 0.36  |
| Thyroid (%ID)     | 0.02 ± 0.01  | 0.02 ± 0.01  | 0.01 ± 0.00  | 0.02 ± 0.00  | 0.02 ± 0.00  |
| Abscess/Muscle    | 4.15 ± 0.49  | 3.48 ± 0.70  | 2.52 ± 0.56  | 2.64 ± 0.65  | 2.62 ± 0.42  |
| Abscess/Blood     | 0.81 ± 0.05  | 0.75 ± 0.10  | 0.56 ± 0.09  | 0.66 ± 0.16  | 0.69 ± 0.04  |

Table S3. Biodistribution results of [<sup>99m</sup>Tc]Tc(CO)<sub>3</sub>-CNnUBI 29-41 in *S. aureus*-infected mice (mean ± SD, %ID/g, n = 5, 120 min p.i.)

| Tissues | n = 5       | n = 6       | n = 7       | n = 8       | n = 9       |
|---------|-------------|-------------|-------------|-------------|-------------|
| Heart   | 2.04 ± 0.23 | 1.25 ± 0.14 | 1.45 ± 0.17 | 1.36 ± 0.04 | 2.04 ± 0.17 |

| Tissues           | n = 5        | n = 6        | n = 7        | n = 8        | n = 9        |
|-------------------|--------------|--------------|--------------|--------------|--------------|
| Liver             | 5.81 ± 0.44  | 10.83 ± 1.96 | 14.57 ± 4.57 | 14.37 ± 1.49 | 18.83 ± 1.56 |
| Lung              | 5.03 ± 0.97  | 3.82 ± 0.68  | 5.47 ± 1.08  | 3.65 ± 0.25  | 5.97 ± 1.17  |
| Kidney            | 16.35 ± 1.46 | 38.86 ± 4.50 | 35.63 ± 4.16 | 25.07 ± 0.99 | 24.83 ± 1.90 |
| Spleen            | 2.42 ± 0.23  | 5.71 ± 1.29  | 5.91 ± 0.76  | 5.39 ± 1.25  | 8.69 ± 1.35  |
| Stomach           | 2.84 ± 0.68  | 2.76 ± 0.43  | 3.32 ± 1.33  | 2.56 ± 1.13  | 6.83 ± 2.63  |
| Bone              | 2.38 ± 0.42  | 1.36 ± 0.68  | 2.15 ± 0.26  | 1.79 ± 0.22  | 2.58 ± 0.22  |
| Muscle            | 1.44 ± 0.51  | 0.69 ± 0.10  | 0.80 ± 0.21  | 0.57 ± 0.06  | 0.97 ± 0.25  |
| Small Intestines  | 3.19 ± 0.78  | 6.31 ± 1.17  | 5.11 ± 2.07  | 4.39 ± 1.87  | 5.69 ± 1.79  |
| Large Intestines  | 3.28 ± 1.24  | 3.54 ± 1.17  | 1.83 ± 0.67  | 1.84 ± 1.00  | 3.28 ± 1.91  |
| Abscess           | 3.44 ± 0.89  | 1.70 ± 0.34  | 1.86 ± 0.16  | 1.33 ± 0.24  | 2.41 ± 0.26  |
| Blood             | 5.75 ± 0.98  | 2.36 ± 0.37  | 2.70 ± 0.27  | 2.07 ± 0.06  | 3.25 ± 0.26  |
| Gallbladder (%ID) | 0.90 ± 0.34  | 0.37 ± 0.27  | 0.67 ± 0.44  | 0.39 ± 0.16  | 1.65 ± 0.88  |
| Thyroid (%ID)     | 0.15 ± 0.06  | 0.10 ± 0.03  | 0.09 ± 0.05  | 0.10 ± 0.02  | 0.22 ± 0.07  |
| Abscess/Muscle    | 2.49 ± 0.65  | 2.48 ± 0.45  | 2.43 ± 0.49  | 2.42 ± 0.37  | 2.60 ± 0.68  |
| Abscess/Blood     | 0.67 ± 0.15  | 0.73 ± 0.19  | 0.69 ± 0.08  | 0.64 ± 0.11  | 0.75 ± 0.12  |

Table S4. Biodistribution results of [<sup>99m</sup>Tc]TcN-CNnUBI 29-41 in *S. aureus*-infected mice

(mean ± SD, %ID/g, n = 5, 120 min p.i.)

| Tissues | n = 5       | n = 6       | n = 7       | n = 8       | n = 9       |
|---------|-------------|-------------|-------------|-------------|-------------|
| Heart   | 0.21 ± 0.02 | 0.22 ± 0.04 | 0.23 ± 0.01 | 0.18 ± 0.01 | 0.28 ± 0.03 |
| Liver   | 2.63 ± 0.37 | 1.30 ± 0.28 | 1.75 ± 0.32 | 1.78 ± 0.14 | 3.26 ± 0.34 |

| Tissues           | n = 5        | n = 6        | n = 7        | n = 8       | n = 9       |
|-------------------|--------------|--------------|--------------|-------------|-------------|
| Lung              | 0.60 ± 0.06  | 0.70 ± 0.19  | 0.68 ± 0.05  | 0.75 ± 0.05 | 1.38 ± 0.16 |
| Kidney            | 17.99 ± 1.21 | 13.30 ± 2.00 | 10.60 ± 1.61 | 7.44 ± 0.77 | 8.08 ± 0.89 |
| Spleen            | 0.90 ± 0.21  | 0.49 ± 0.07  | 0.45 ± 0.10  | 0.84 ± 0.23 | 1.23 ± 0.38 |
| Stomach           | 0.32 ± 0.23  | 0.54 ± 0.12  | 0.68 ± 0.22  | 0.39 ± 0.11 | 0.85 ± 0.21 |
| Bone              | 0.41 ± 0.07  | 0.26 ± 0.04  | 0.33 ± 0.07  | 0.27 ± 0.04 | 0.37 ± 0.08 |
| Muscle            | 0.09 ± 0.01  | 0.10 ± 0.02  | 0.11 ± 0.01  | 0.11 ± 0.06 | 0.12 ± 0.02 |
| Small Intestines  | 1.10 ± 0.31  | 1.03 ± 0.37  | 1.38 ± 0.19  | 1.13 ± 0.81 | 2.46 ± 0.79 |
| Large Intestines  | 0.96 ± 0.61  | 0.25 ± 0.15  | 0.59 ± 0.32  | 1.81 ± 1.24 | 1.36 ± 1.03 |
| Abscess           | 0.18 ± 0.05  | 0.33 ± 0.12  | 0.28 ± 0.05  | 0.25 ± 0.06 | 0.32 ± 0.11 |
| Blood             | 0.27 ± 0.02  | 0.47 ± 0.11  | 0.47 ± 0.05  | 0.34 ± 0.04 | 0.45 ± 0.06 |
| Gallbladder (%ID) | 0.19 ± 0.10  | 0.10 ± 0.03  | 0.15 ± 0.10  | 0.29 ± 0.15 | 0.20 ± 0.16 |
| Thyroid (%ID)     | 0.01 ± 0.00  | 0.01 ± 0.00  | 0.01 ± 0.00  | 0.01 ± 0.00 | 0.01 ± 0.00 |
| Abscess/Muscle    | 2.10 ± 0.80  | 3.32 ± 0.99  | 2.47 ± 0.47  | 2.81 ± 0.55 | 2.79 ± 0.82 |
| Abscess/Blood     | 0.69 ± 0.22  | 0.70 ± 0.15  | 0.58 ± 0.12  | 0.72 ± 0.13 | 0.70 ± 0.29 |

Table S5. Biodistribution results of [<sup>99m</sup>Tc]Tc-CN5UBI 29-41 in *S. aureus*-infected and turpentine-oil-inflamed mice (mean ± SD, %ID/g, n = 5)

| Tissue | <i>S. aureus</i> -infected mice model |             |             | turpentine-oil-inflamed mice model |
|--------|---------------------------------------|-------------|-------------|------------------------------------|
|        | 30 min                                | 120 min     | 240 min     | 120 min                            |
| Heart  | 1.21 ± 0.14                           | 0.89 ± 0.25 | 0.58 ± 0.11 | 0.61 ± 0.03                        |
| Liver  | 2.42 ± 0.14                           | 2.24 ± 0.67 | 2.23 ± 0.35 | 1.44 ± 0.23                        |

| Tissue            | <i>S. aureus</i> -infected mice model |              |              | turpentine-oil-inflamed mice model |
|-------------------|---------------------------------------|--------------|--------------|------------------------------------|
|                   | 30 min                                | 120 min      | 240 min      | 120 min                            |
| Lung              | 3.09 ± 0.25                           | 1.85 ± 0.29  | 1.51 ± 0.81  | 1.26 ± 0.13                        |
| Kidney            | 19.80 ± 2.71                          | 18.00 ± 3.49 | 17.49 ± 3.81 | 13.05 ± 1.24                       |
| Spleen            | 1.04 ± 0.30                           | 0.77 ± 0.19  | 0.74 ± 0.21  | 0.59 ± 0.10                        |
| Stomach           | 0.43 ± 0.12                           | 0.70 ± 0.24  | 0.93 ± 0.50  | 1.82 ± 0.81                        |
| Bone              | 1.67 ± 0.35                           | 1.06 ± 0.14  | 0.72 ± 0.15  | 0.82 ± 0.19                        |
| Muscle            | 0.86 ± 0.43                           | 0.34 ± 0.03  | 0.41 ± 0.06  | 0.32 ± 0.02                        |
| Small Intestines  | 2.12 ± 0.51                           | 1.65 ± 0.95  | 0.91 ± 0.39  | 0.91 ± 0.21                        |
| Large Intestines  | 0.67 ± 0.10                           | 2.23 ± 1.02  | 2.93 ± 1.50  | 0.62 ± 0.18                        |
| Abscess           | 1.64 ± 0.40                           | 1.44 ± 0.46  | 1.42 ± 0.59  | 0.73 ± 0.05 *                      |
| Blood             | 3.59 ± 0.15                           | 1.81 ± 0.29  | 1.79 ± 0.64  | 1.28 ± 0.12                        |
| Gallbladder (%ID) | 0.03 ± 0.01                           | 0.13 ± 0.10  | 0.28 ± 0.18  | 0.15 ± 0.04                        |
| Thyroid (%ID)     | 0.03 ± 0.01                           | 0.02 ± 0.01  | 0.02 ± 0.00  | 0.02 ± 0.01                        |
| Abscess/Muscle    | 2.70 ± 0.97                           | 4.15 ± 0.49  | 3.46 ± 0.67  | 2.52 ± 0.22 *                      |
| Abscess/Blood     | 0.46 ± 0.12                           | 0.81 ± 0.05  | 0.79 ± 0.08  | 0.59 ± 0.06 *                      |

\**P* < 0.05



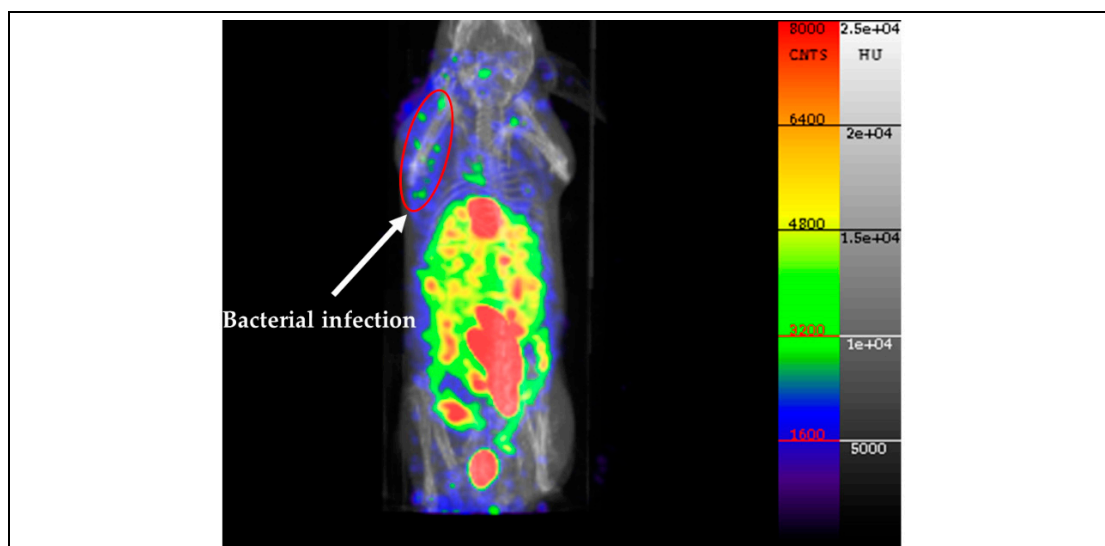

Figure S19. SPECT image of  $[^{99m}\text{Tc}]\text{Tc}(\text{CO})_3\text{-CN5UBI 29-41}$  in mice with bacterial infection at 120 min postinjection

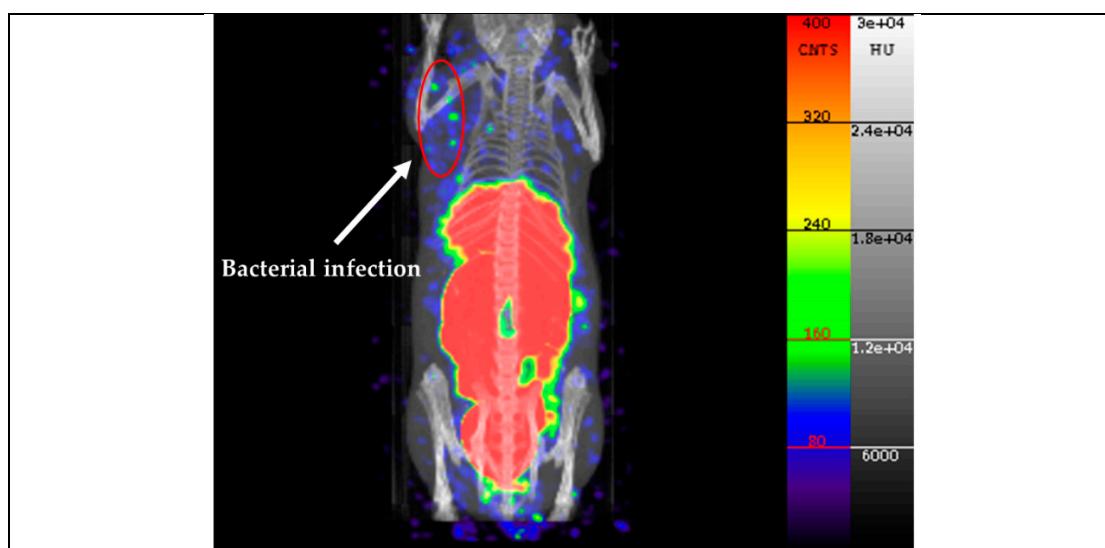

Figure S20. SPECT image of  $[^{99m}\text{Tc}]\text{TcN-CN5UBI 29-41}$  in mice with bacterial infection at 120 min postinjection
